# Supplementary material
Source: ML conference proceedings conference paper supplement (https://openaccess.thecvf.com/content/WACV_2020/html/Li_Weakly-Supervised_Multi-Person_Action_WACV_2020_paper.html)

## Supplementary Material for Weakly-Supervised Multi-Person Action Recognition in 360° Videos

Visualizations of person detection results using Mask-RCNN on different panoramic frames. There exist some inaccurate or missing detections, which can mostly be corrected by temporal max-pooling of the detection masks from adjacent frames.

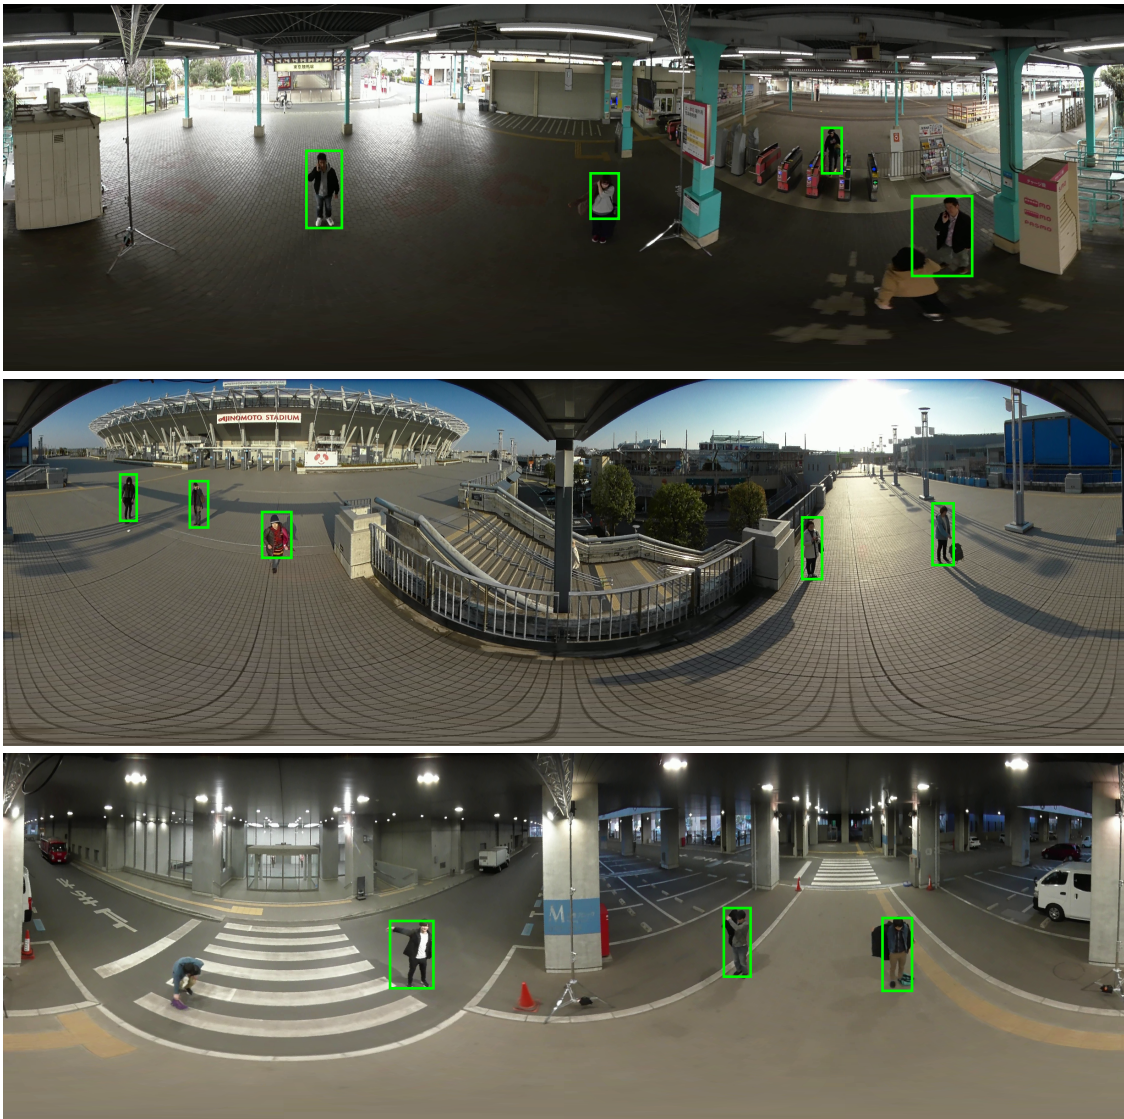

Supplement: Supplementary file 1 [file Li_Weakly-Supervised_Multi-Person_Action_WACV_2020_supplemental.pdf]
